# Supplementary material for: Depersonalisation and derealisation: assessment and management
Source: HighWire-hosted journal article supplement (doi:10.1136/bmj.j745), 2017-03-23
Supplement: depersonalisation_v19_web.pdf [file depersonalisation_v19_web.pdf]

# Assessing severity of depersonalisation and derealisation symptoms

Transient symptoms of depersonalisation and derealisation are very common in the general population, often during periods of stress or fatigue, or concurrent with a number of medical conditions. They can also occur as a chronic primary mental health disorder called Depersonalisation/Derealisation Disorder (DPRD).

### What your patient may say

- It's like I'm just watching life from behind glass
- I feel completely detached from everything around me
- I feel as if I'm living in a dream
- I feel like I don't exist anymore

Increasing symptom severity →

### 1 Transient symptoms

Mildly distressing

Seconds to a few days

**Typical triggers**

- Fatigue
- Jet lag
- Life-threatening incidents
- After heavy alcohol use
- Illicit drug use

**Comorbidities and risk factors**

None

**Intervention**

Give the patient a name for their symptom. Explain why it might have been triggered in their case.

Review after 2 weeks. If symptoms persist, consider other levels of severity

### 2 Secondary to other disorder

Moderately distressing

Panic attacks: Minutes

Psychiatric disorders: Weeks to months

**Typical triggers**

- Panic attack
- Aura of migraine or seizure

**Comorbidities and risk factors**

- Neurological conditions  
E.g. migraine or temporal lobe epilepsy
- Psychiatric conditions  
E.g. depression or schizophrenia
- Anxiety disorders  
Particularly those with panic or obsessive compulsive disorder

**Intervention**

**Treat primary condition**

**Anxiety or depression**  
Psychopharmacological management  
Psychological management  
Refer for low intensity psychological therapy

**Psychosis**  
Refer to CMHT\*

Review after treatment. If symptoms persist, consider primary DPRD.

### 3 Part of PTSD or personality disorder

Moderately–severely distressing

Functional impairment possible

Months to years

**Typical triggers**

Period of prolonged stress

**Comorbidities and risk factors**

- History of significant childhood abuse and trauma
- Post-traumatic stress disorder
- Personality disorders  
Particularly borderline personality disorder

**Intervention**

**Treat primary condition**

**Childhood or adult trauma**  
Refer for high intensity trauma-focused psychological therapy

**Personality disorder**  
Refer to secondary care services

Review after treatment. If symptoms persist, consider primary DPRD.

### 4 Primary DPRD

Moderately–severely distressing

Functional impairment likely

Months to years

Onset often in adolescence

**Typical triggers**

- Acute stress
- Use of illicit drugs  
Particularly after cannabis use

**Comorbidities and risk factors**

- May be none
- A history of anxiety problems
- Family history of anxiety disorders
- Reported parental emotional abuse, perceived criticism and/or emotional neglect

**Intervention**

Elicit concerns, and offer reassurance and hope that they can recover. Signpost patient to self-help material, online and phone support, particularly recovery stories.

Review after 2 months. If symptoms persist, refer to local secondary care services for psychiatric assessment and intervention.

Review after treatment. If symptoms persist, consider referral to tertiary or specialised DPRD centre.

\*CMHT = Community Mental Health Teams

**Disclaimer:** This infographic is not a validated clinical decision aid. This information is provided without any representations, conditions or warranties that it is accurate or up to date. BMJ and its licensors assume no responsibility for any aspect of treatment administered with the aid of this information. Any reliance placed on this information is strictly at the user's own risk. For the full disclaimer wording see BMJ's terms and conditions: <http://www.bmj.com/company/legal-information/>
